# Supplementary material for: Facile preparation of MoS2/maleic acid composite as high-performance anode for lithium ion batteries
Source: Royal Society of Chemistry journal article supplement (doi:10.1039/d0nj03195j), 2020-01-01
Supplement: d0nj03195j1.pdf [file d0nj03195j1.pdf]

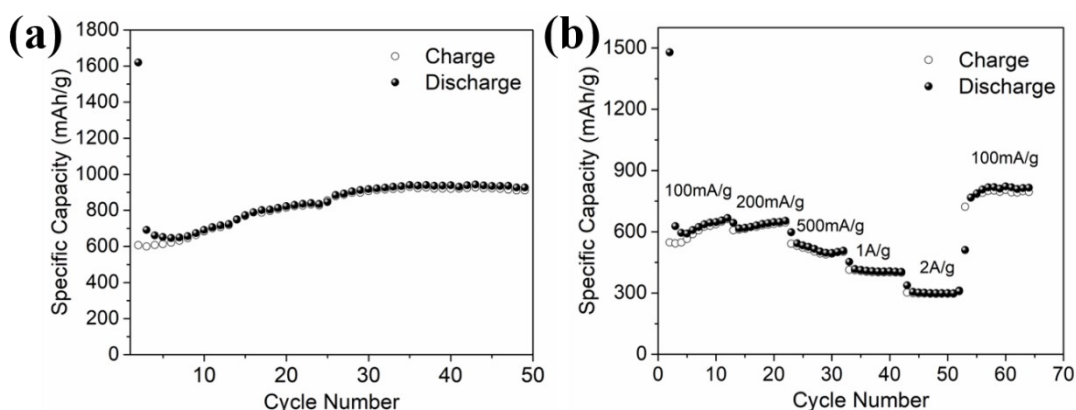

Fig. S 1. (a)Cycling performance and (b) of pure maleic acid anode.

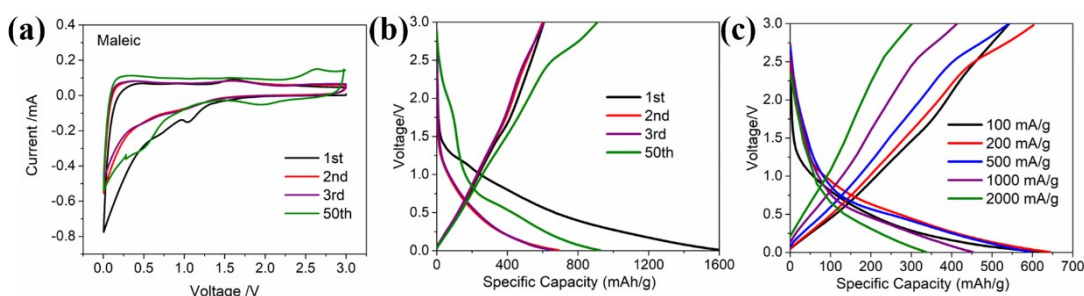

Fig. S 2. (a) CV curves of pure maleic acid anode at scan rate of 0.2 mV/s.  
(b)(c)Charge-discharge curves of pure maleic acid anode at 100 mA/g and different current rate.

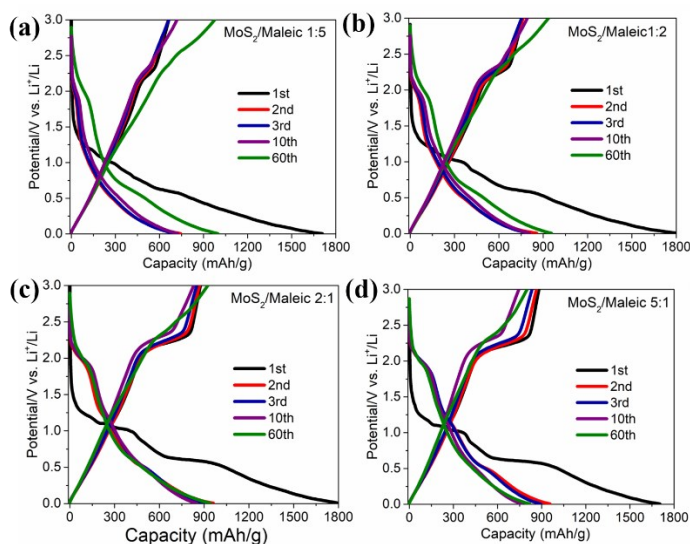

Fig. S 3 Charge-discharge profiles of (a)MoS<sub>2</sub>/Maleic 1:5, (b) 1:2, (c) 2:1, and (d) 5:1, at current density of 100 mA/g.

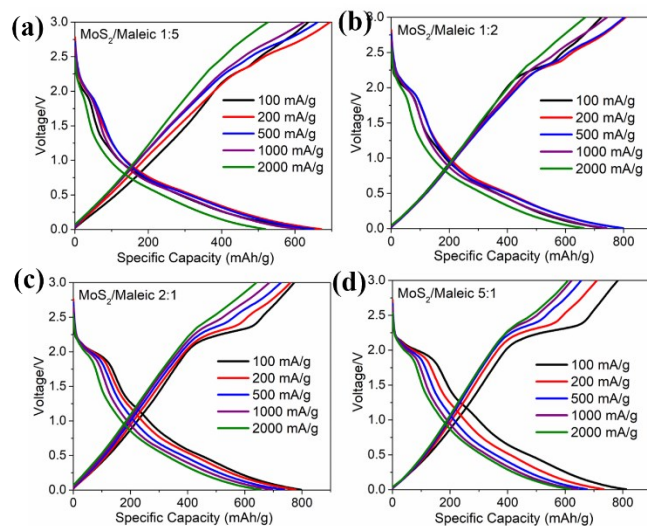

Fig. S 4. Charge-discharge profiles of (a)MoS<sub>2</sub>/Maleic 1:5, (b) 1:2, (c) 2:1 and (a)5:1, at different current density.

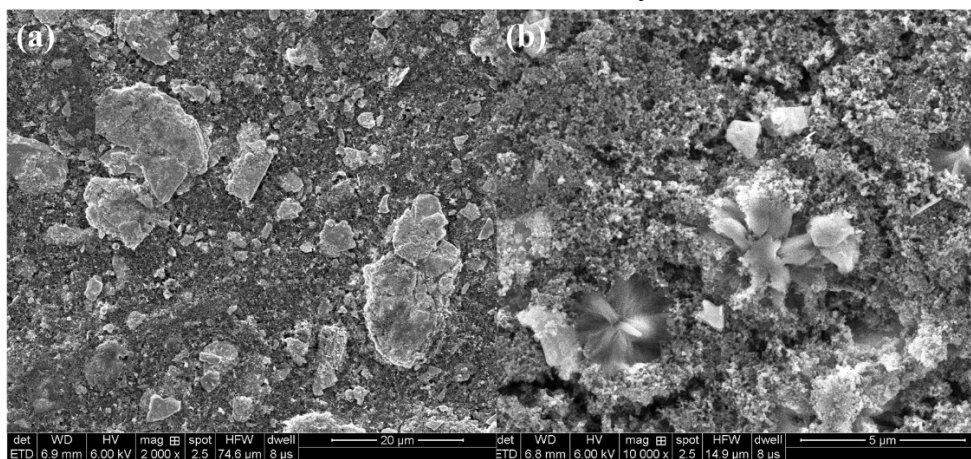

Fig. S 5. SEM images of (a) pristine MoS<sub>2</sub> and (b) MoS<sub>2</sub>/Maleic 1:1 anode before cycle.

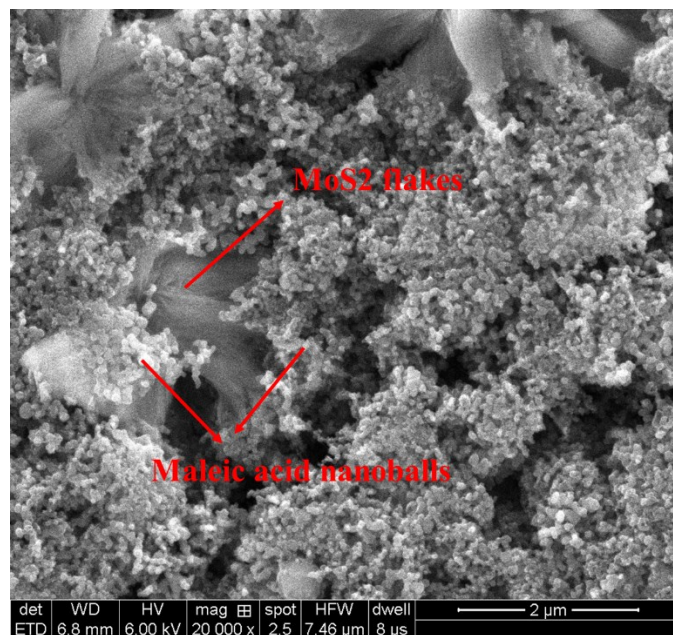

Fig. S 6. HRSEM image of pristine MoS<sub>2</sub>/maleic 1:1 anode.
